# Supplementary material for: Analysis of Surface Microgeometry Created by Electric Discharge Machining
Source: MDPI journal article supplement (doi:10.3390/ma13173830), 2020-08-30
Supplement: s1 [file s1]

Supplementary Information

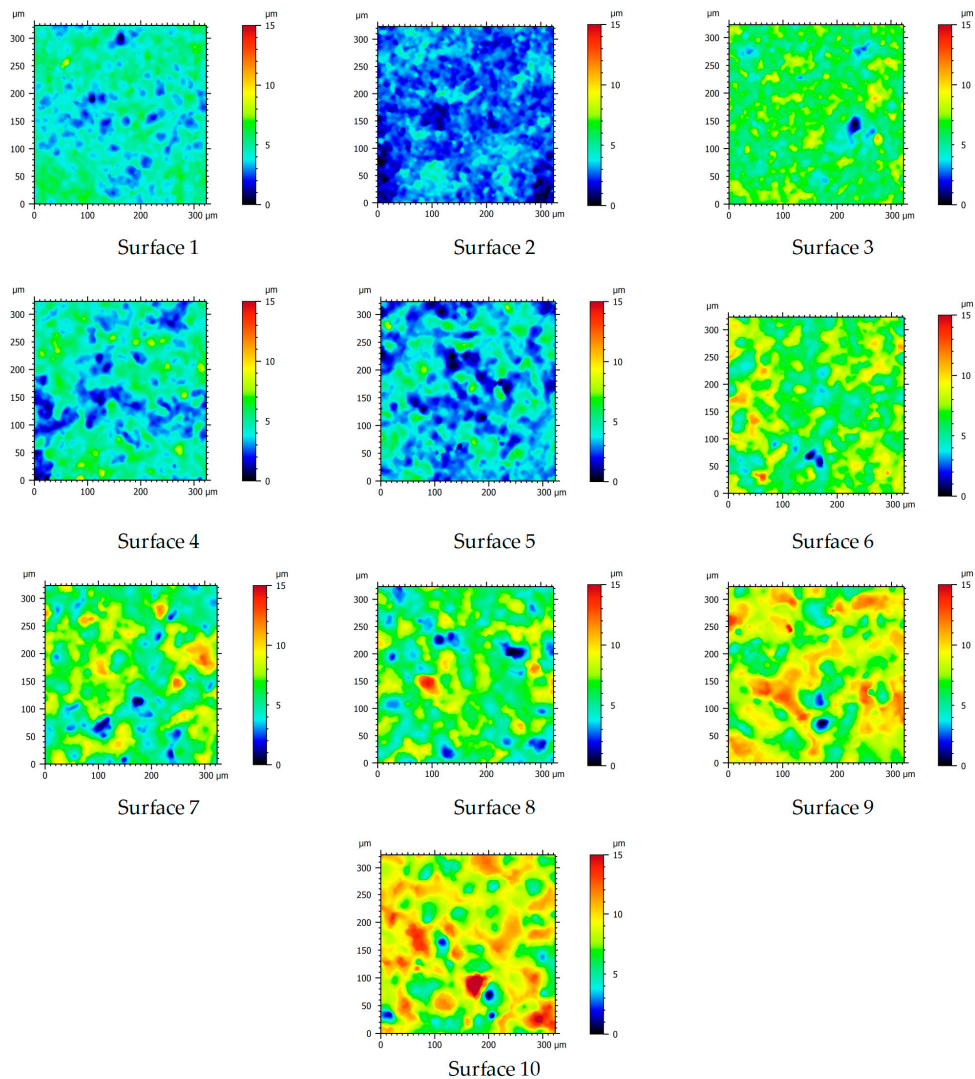

**Figure S1.** Renderings of representative regions of all ten analyzed surfaces.

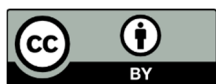

© 2020 by the authors. Submitted for possible open access publication under the terms and conditions of the Creative Commons Attribution (CC BY) license (<http://creativecommons.org/licenses/by/4.0/>).
